# Supplementary material
Source: PubMed Central journal article supplement (PMC8482300)
Supplement: jamacardiol-e213702-s001.pdf [file jamacardiol-e213702-s001.pdf]

## Supplemental Online Content

Singer DE, Ziegler PD, Koehler JL, Sarkar S, Passman RS. Temporal association between episodes of atrial fibrillation and risk of ischemic stroke. *JAMA Cardiol*. Published online September 29, 2021. doi:10.1001/jamacardio.2021.3702

**eTable 1.** *Current Procedural Terminology (CPT)* corroborating a diagnosis of stroke

**eTable 2.** AF patterns in paired 5-day case and control periods prior to an ischemic stroke, matched 1:1 within patients

**eFigure 1.** Assembly of 891 patients with CIEDs who sustained an ischemic stroke and also had 120 days of continuous heart rhythm recording prestroke

**eFigure 2.** AF records for all patients with stroke with discordant patterns in days 1 to 30 and 91 to 120 prestroke

**eFigure 3.** Atrial fibrillation (AF) records for a random sample of patients with stroke with concordant patterns in days 1 to 30 and 91 to 120 prestroke

**eFigure 4.** Odds of ischemic stroke within 30 days of a qualifying atrial fibrillation (AF) episode vs 91 to 120 days after a qualifying AF episode

This supplementary material has been provided by the authors to give readers additional information about their work.

**eTable 1. Current Procedural Terminology (CPT) corroborating a diagnosis of stroke**

| <b>Procedure</b>          | <b>CPT Code</b>                                                                                                                                      |
|---------------------------|------------------------------------------------------------------------------------------------------------------------------------------------------|
| CT/MRI                    | 70400,70450,70460,70470,70480,70481,70482,70486,70487,70488,70490,70491,<br>70492,70540,70541,70542,70543,70551,70552,70553,70554, 70555,70557,70559 |
| CTA/MRA                   | 70496,70498,70544,70545,70546,70547,70548,70549                                                                                                      |
| Blood Glucose             | 82962,82948,82947                                                                                                                                    |
| ECG/Holter                | 93010,93005,93000,93272,93271,93270,93268,93229,93228,93227,93226,93225,<br>93224                                                                    |
| Coagulation test          | 85730, 85610                                                                                                                                         |
| Blood Panel               | 85027, 85025,80048,80053,80061,80069,80076                                                                                                           |
| Chest Xray                | 71010, 71020                                                                                                                                         |
| Echo                      | 93325,93321,93320,93312,93313,93314,93010,93005,93000                                                                                                |
| TEE                       | 93312,93313,93314                                                                                                                                    |
| Hospital Critical<br>Care | 99285,99291,99292                                                                                                                                    |
| Injection/Infusion        | 96372, 96376, 96375,96374,96367,96366,96365                                                                                                          |
| EEG                       | 95951,95822,95819,95816,95813, 95812, 95953                                                                                                          |
| Carotid USG               | 93880,93886,93882,93888                                                                                                                              |
| Carotid<br>Angiogram      | 36228,36227,36226,36225,36224,36223,36222,36221,75685,75680,75676,75671,<br>75665,75662, 75660,75650                                                 |
| Thrombectomy              | 37184,37185,37186,61645,37195                                                                                                                        |

**eTable 2.** AF patterns in paired 5-day case and control periods prior to an ischemic stroke, matched 1:1 within patients<sup>1,2</sup>

| Paired 5-day periods, pre-stroke | AF in paired 5-day periods (within patient), case period/control period |     |     |     | Odds Ratio (95% CI) for stroke <sup>3</sup> |
|----------------------------------|-------------------------------------------------------------------------|-----|-----|-----|---------------------------------------------|
|                                  | +/-                                                                     | -/+ | +/+ | -/- |                                             |
| 1-5/91-95                        | 55                                                                      | 11  | 116 | 27  | 5.0 (2.6-9.6)                               |
| 6-10/96-100                      | 9                                                                       | 9   | 0   | 191 | 1.0 (0.4-2.5)                               |
| 11-15/101-105                    | 1                                                                       | 6   | 0   | 202 | 0.2 (0.0-1.4)                               |
| 16-20/106-110                    | 3                                                                       | 6   | 0   | 200 | 0.5 (0.1-2.0)                               |
| 21-25/111-115                    | 9                                                                       | 6   | 0   | 194 | 1.5 (0.5-4.2)                               |
| 26-30/116-120                    | 2                                                                       | 3   | 0   | 204 | 0.7 (0.1-4.0)                               |

<sup>1</sup>“AF” indicates a cumulative period of AF of  $\geq 5.5$  hours on a given day.

<sup>2</sup> “+/-” indicates occurrence of AF in the 5-day case period pre-stroke and absence of AF in the corresponding, more distant, 5-day control period. Similarly, “-/+” indicates absence of AF in the case period but presence in the control period; “+/+” indicates AF in both periods; and “-/-” indicates absence of AF in both periods.

<sup>3</sup> Odds ratio is calculated as the ratio of discordant pairs, +/- divided by -/+.

**eFigure 1.** Assembly of 891 patients with CIEDs who sustained an ischemic stroke and also had 120 days of continuous heart rhythm recording prestroke

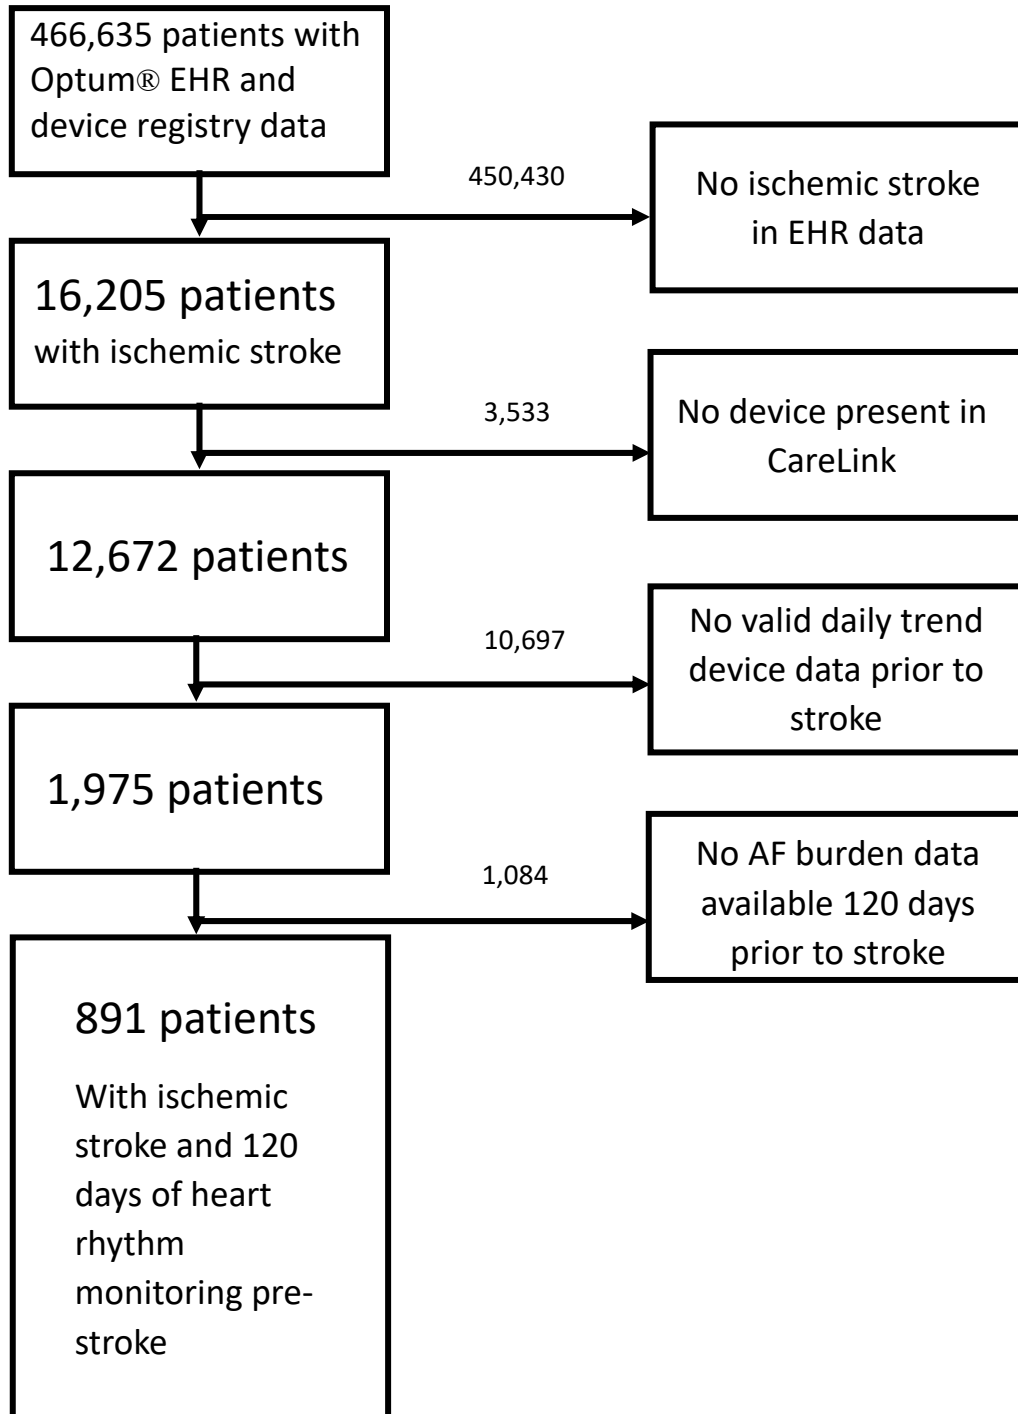

**eFigure 2.** AF records for all patients with stroke with discordant patterns in days 1 to 30 and 91 to 120 prestroke

The threshold was set at 5.5 hours of AF on any given day during the period. Each row is a separate patient. The red vertical dashed line denotes the day of ischemic stroke. The blue vertical dashed lines demarcate the case period (days 1 to 30 prestroke) and control period (days 91 to 120 pre-stroke). The x-axis is days from stroke. The y-axis is hours of AF on each day prestroke. A, Patients who had 5.5 hours or more of AF on at least 1 day during the case period (days 1 to 30 prestroke) and no such days in the control period (days 91 to 120 prestroke). B, Patients who had 5.5 hours or more of AF on at least 1 day during the control period and no such days in the case period.

**a. Discordant: Case >Control (Part 1)**

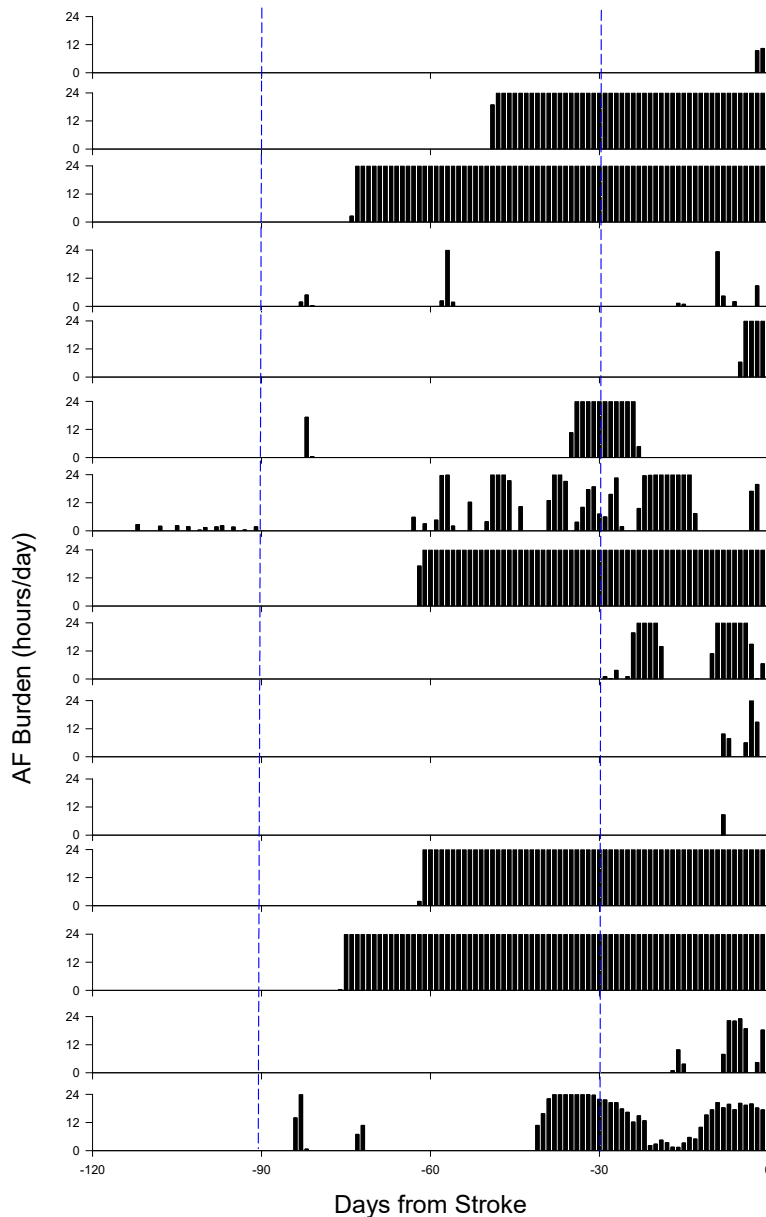

## Discordant: Case >Control (Part 2)

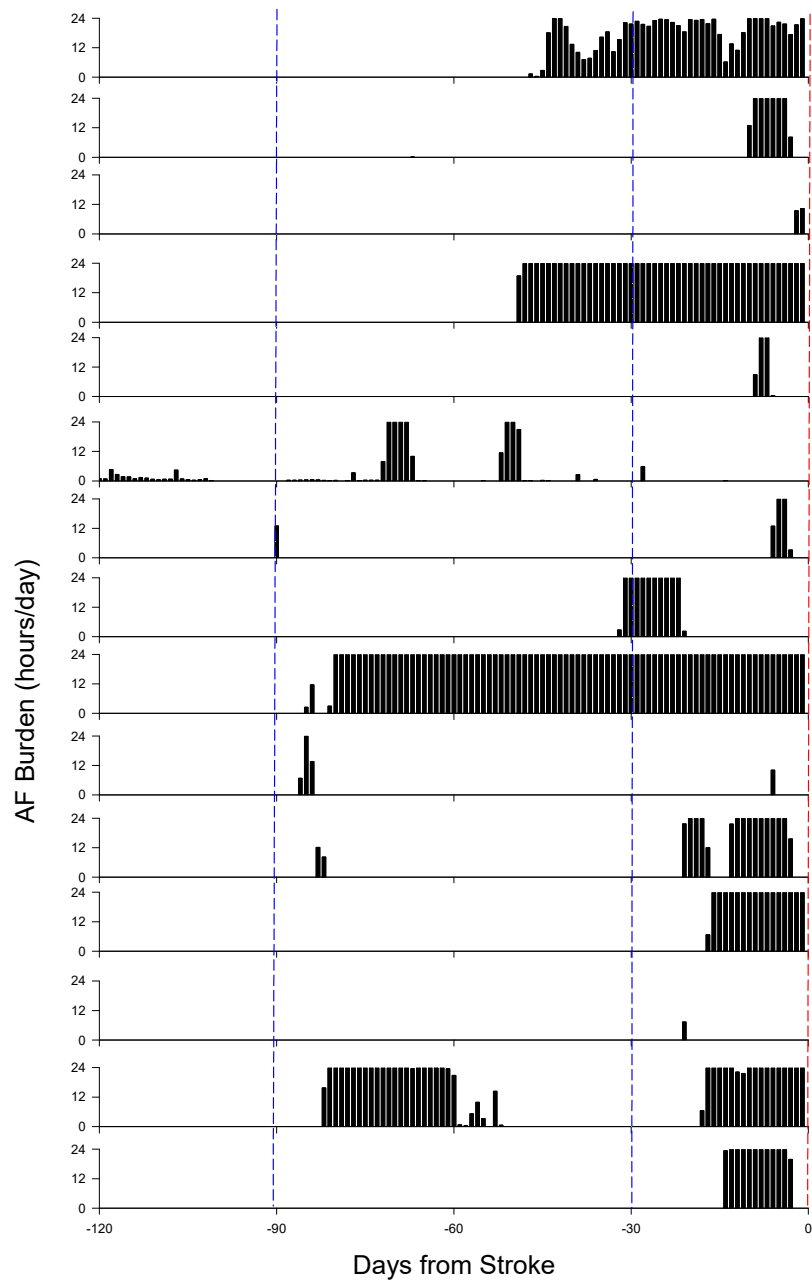

### Discordant: Case >Control (Part 3)

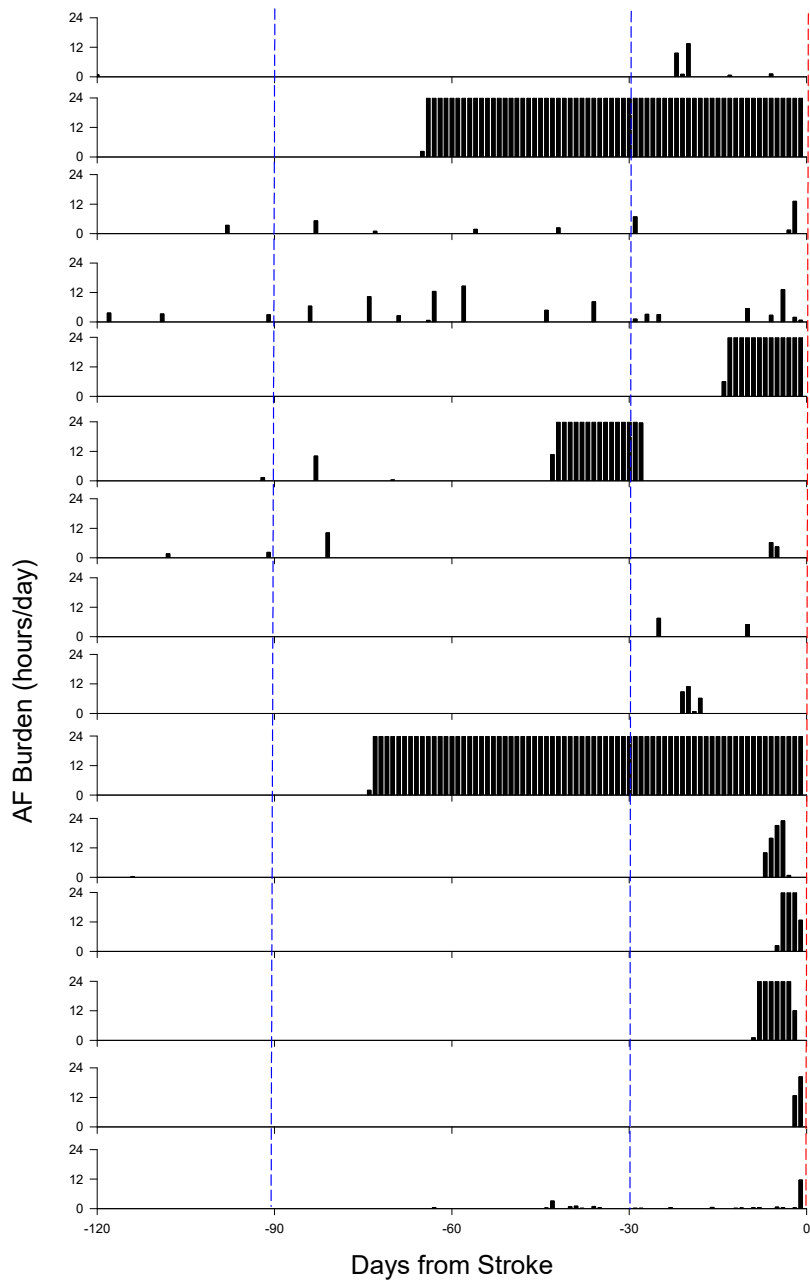

### Discordant: Case >Control (Part 4)

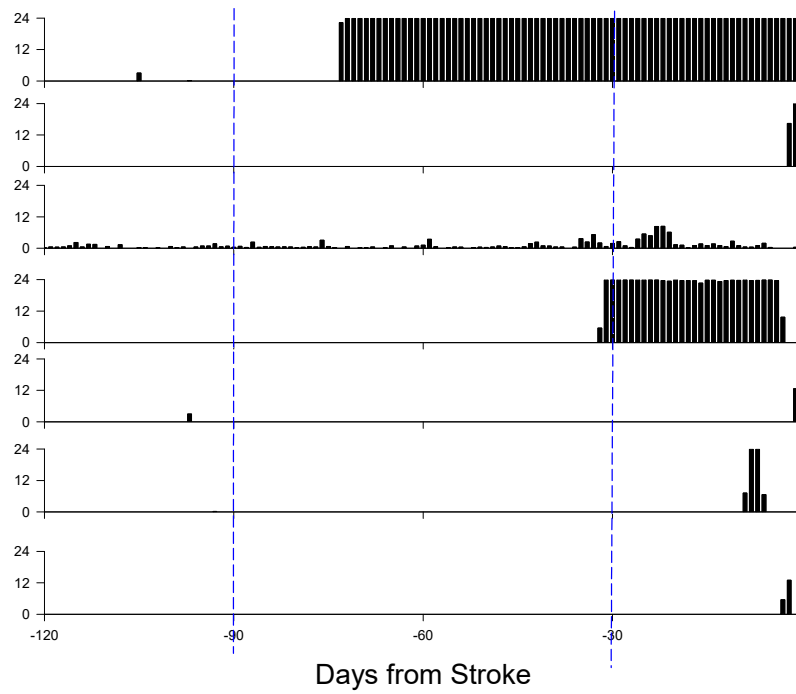



**b. Discordant: Control >Case**

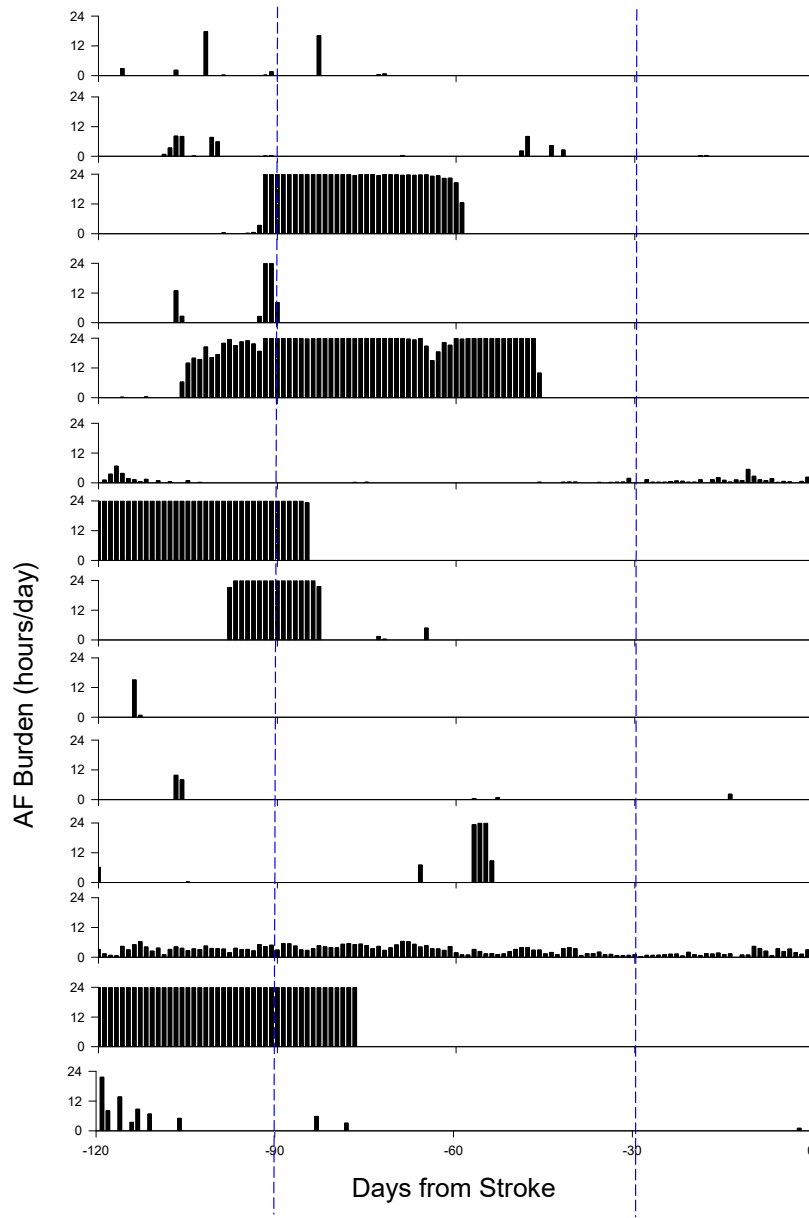

**eFigure 3.** Atrial fibrillation (AF) records for a random sample of patients with stroke with concordant patterns in days 1 to 30 and 91 to 120 prestroke

$\geq 5.5$  Hours of AF on any given day during the 30-day periods was used as the AF burden threshold: 10 patients meeting or exceeding the AF threshold in both periods (a.) and 10 patients not meeting or exceeding the AF threshold in either period (b.).

**a. Concordant: Case and control  $\geq 5.5$  hours of AF\***

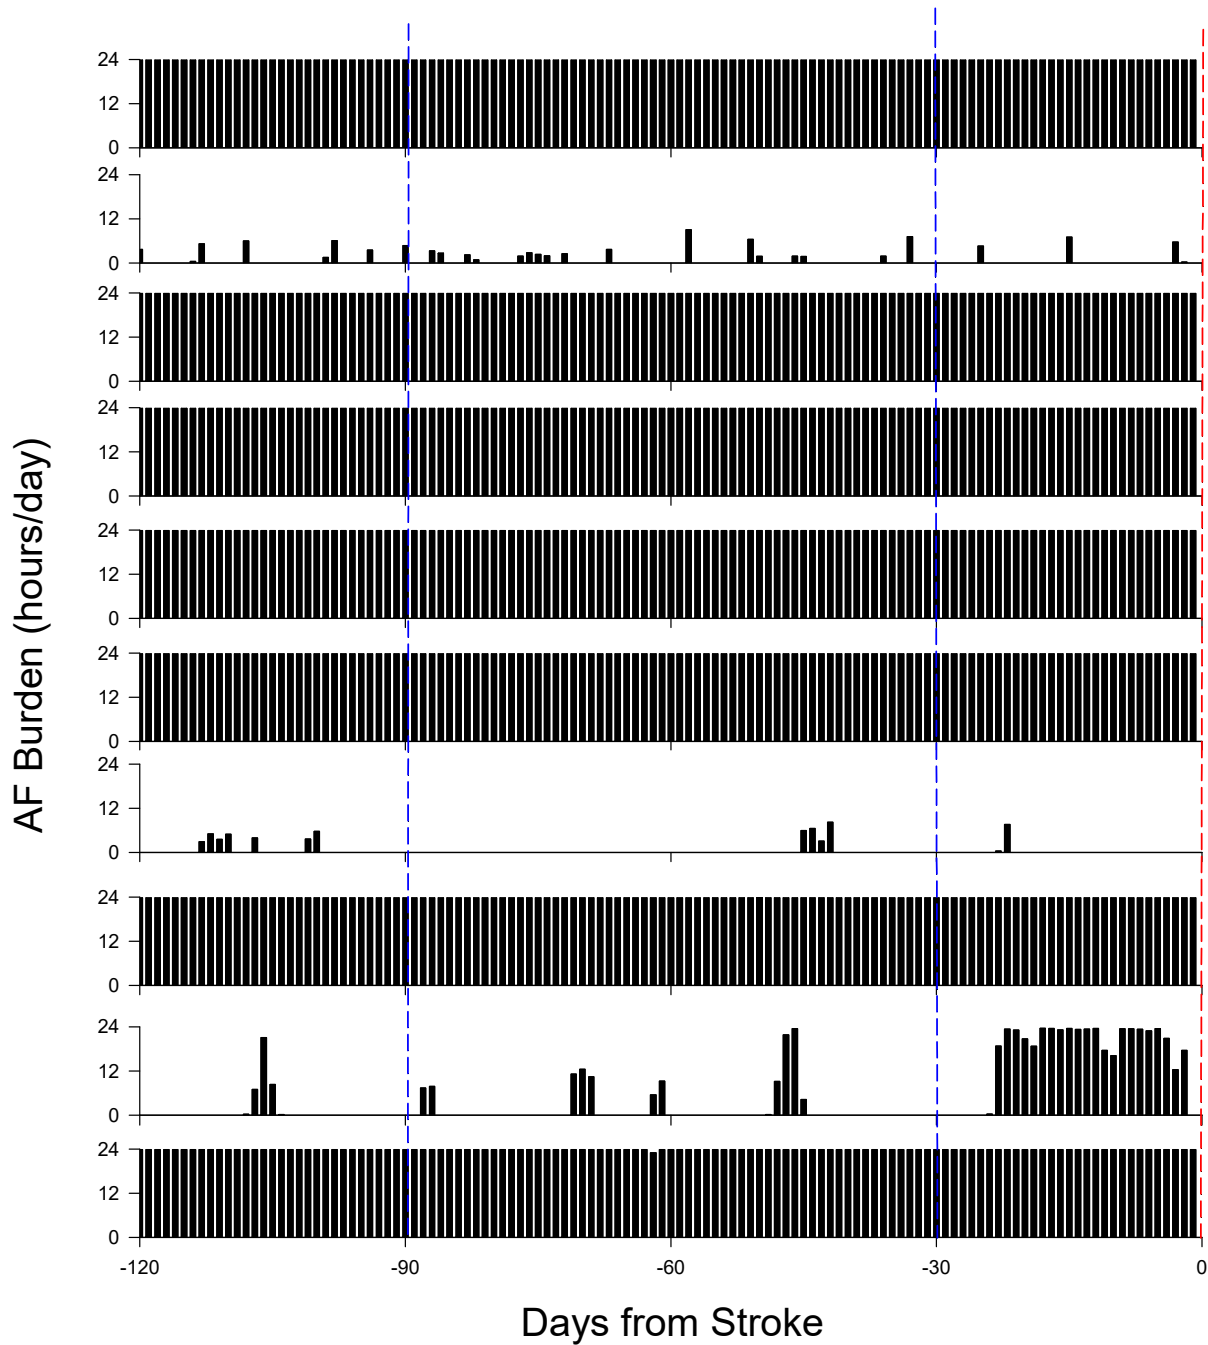

**b. Concordant: Case and Control <5.5 hours**

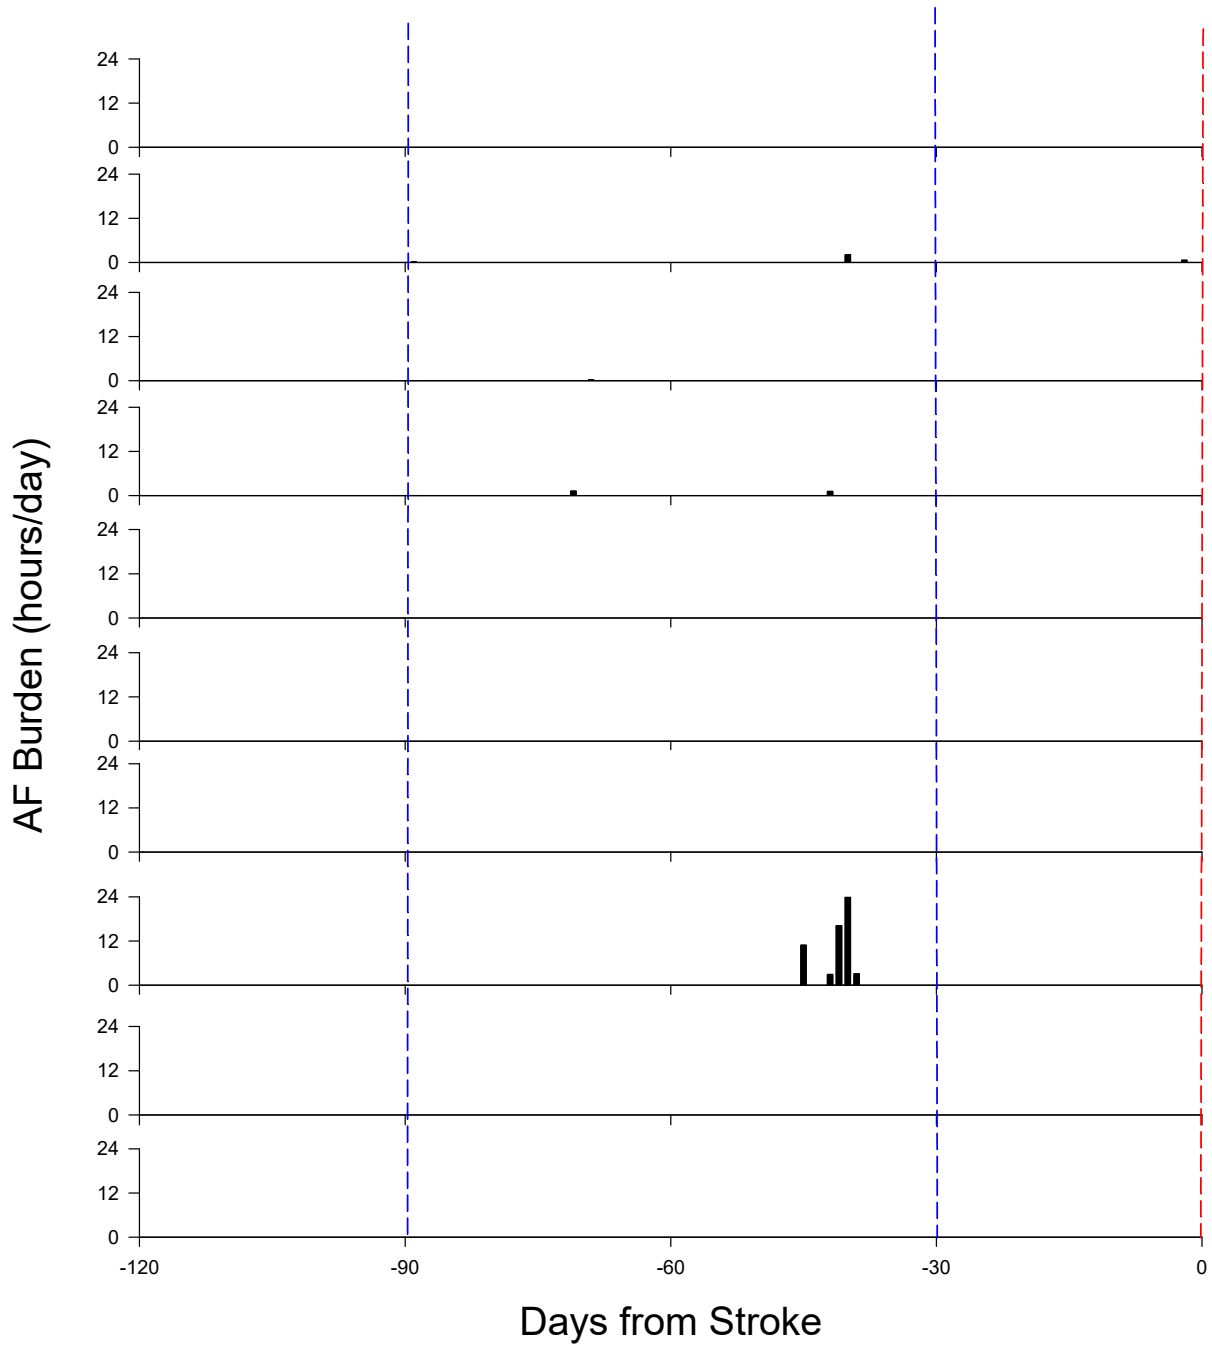

\*Each row is a separate patient. The red vertical line dashed denotes the day of ischemic stroke. The blue vertical dashed lines demarcate the case (days 1-30 pre-stroke) and control (days 91-120 pre-stroke) periods. The x-axis is days from stroke. The y-axis is hours of AF on each day pre-stroke.

**eFigure 4.** Odds of ischemic stroke within 30 days of a qualifying atrial fibrillation (AF) episode vs 91 to 120 days after a qualifying AF episode

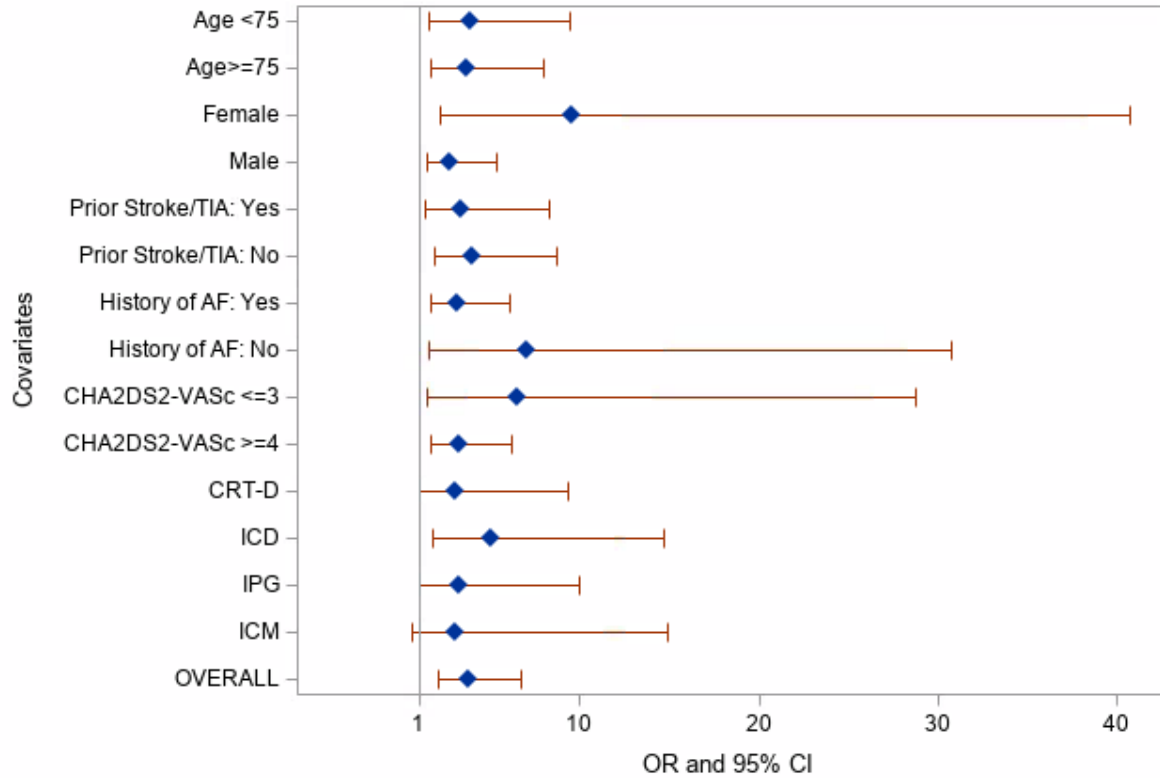

Abbreviations: TIA, transient ischemic attack; CHA2DS2-VASc, AF stroke risk score including C, congestive heart failure (1 point); H, diagnosis of hypertension (1 point); A, age $\geq$ 75 years (2 points); D, diagnosis of diabetes (1 point); S, prior stroke (2 points); V, diagnosis of vascular disease (1 point); S, female sex (1 point); CRT-D, cardiac resynchronization therapy defibrillator; ICD, implantable cardioverter defibrillator; IPG, implantable pulse generator; ICM, insertable cardiac monitor. Analysis restricted to patients with a Cardiac Resynchronization Therapy-Pacemaker (CRT-P) device was not done because of the small number of patients with this device (n=19).
